# Supplementary material for: Modelling the chemistry of Mn-doped MgO for bulk and (100) surfaces
Source: Royal Society of Chemistry journal article supplement (doi:10.1039/c6cp04622c), 2016-01-01
Supplement: c6cp04622c1.pdf [file c6cp04622c1.pdf]

## Supplementary Information: Modeling the chemistry of Mn-doped MgO for bulk and (100) surfaces

Andrew J. Logsdail<sup>a,b,e</sup>, Christopher A. Downing<sup>a,c</sup>, Thomas W. Keal<sup>c</sup>, Paul Sherwood<sup>c</sup>, Alexey A. Sokol<sup>a</sup> and C. Richard A. Catlow<sup>\*a,b,d</sup>

|                    | CO <sub>2</sub> axis | B3LYP | B97-3 |
|--------------------|----------------------|-------|-------|
| Mn <sub>surf</sub> | x                    | -0.66 | -0.74 |
|                    | y                    | -0.74 | -0.80 |
|                    | z                    | 0.00  | -0.01 |
| Mn <sub>sub</sub>  | x                    | -0.79 | -0.86 |
|                    | z                    | 0.01  | 0.00  |
| Mg <sup>1</sup>    | x                    | -0.68 | -     |
|                    | z                    | 0.12  | -     |

**Table 1**  $E_{ads}(\text{CO}_2)$  on  $\text{O}_{5c}$  sites over Mn-MgO (100) surface. Also presented are previously calculated results for  $\text{CO}_2$  adsorption on MgO using the B3LYP XC functional and similar basis sets.<sup>1</sup> All values are given in eV.

### References

- 1 C. A. Downing, A. A. Sokol and C. R. A. Catlow, *Phys. Chem. Chem. Phys.*, 2014, **16**, 184–195.

<sup>a</sup> Kathleen Lonsdale Materials Chemistry, Department of Chemistry, University College London, 20 Gordon Street, London, WC1H 0AJ, United Kingdom

<sup>b</sup> Cardiff Catalysis Institute, School of Chemistry, Cardiff University, Cardiff, CF10 3AT, United Kingdom

<sup>c</sup> Scientific Computing Department, STFC Daresbury Laboratory, Daresbury, Warrington, WA4 4AD, United Kingdom

<sup>d</sup> UK Catalysis Hub, Research Complex at Harwell, Science and Technology Facilities Council Rutherford Appleton Laboratory, Harwell Science and Innovation Campus, Oxon, OX11 0QX, United Kingdom

<sup>e</sup> Tel: +44 (0)20 7679 0312 ; E-mail: [a.logsdail@ucl.ac.uk](mailto:a.logsdail@ucl.ac.uk)
